# Supplementary material for: Multiple endocrine neoplasia type 1: analysis of germline MEN1 mutations in the Italian multicenter MEN1 patient database
Source: Springer Nature journal article supplement (doi:10.1007/s12020-018-1566-8), 2018-03-01
Supplement: MOESM1 [file 15500428]

COMMENTS FOR THE AUTHOR:

Reviewer #1: This manuscript by Marini et al provides an analysis of the clinical features of a large cohort of MEN1 patients from a multicentre MEN1 patient database with an attempt to establish genotype-phenotype correlations. The results largely confirm previous findings from the literature - i.e. no obvious genotype-phenotype correlation can be demonstrated - and no significantly novel data are presented. It might perhaps help if more comprehensive data were provided expanding the aims of the analysis beside the genotype-phenotype correlation. The following issues have been encountered and should be addressed:

1) In the Abstract, the sentence on GEP NETs in the Conclusions should be moved to the Results section.

**The sentence has been moved from the “Conclusions” to the “Results” section of the abstract, as requested.**

2) The authors state in the Introduction that germline mutations of the MEN1 gene are responsible for the development of the syndrome. It should be specified that MEN1 mutations are identified in 80-90% of probands with familial disease, and in a smaller percentage of simplex cases.

**A sentence specifying these data has been added, as requested.**

3) It might be worth to specify how variants of unknown significance were interpreted. Were in silico prediction tools used to define the pathogenicity of missense variants? If yes, methods and results should be provided.

**A specific explanation, of how the pathogenicity of intron-exon junction mutations has been assessed, has been added to the “2.2 MEN1 gene mutation analysis” section.**

**Non-synonymous missense mutations have been considered as pathogenic if: 1) they were previously reported as associated with the development of MEN1 in MEN1 pedigrees, in published literature; 2) they were reported as pathogenic variations in mutation databases (i.e Human Mutation Database); 3) they were novel but segregate with the development of MEN1 within our pedigree/s. These methods were added to the “2.2 MEN1 gene mutation analysis” section.**

4) How were unaffected carriers followed up and screened for MEN1 manifestations?

**Currently, all the unaffected carriers are constantly (annually) screened according the international clinical practice guideline for MEN1. A specific sentence, explaining this, has been added to the “discussion” section, paragraph number 8, and also the associated reference has been added.**

5) How many of the reported variants were novel? References for previously reported mutations should be added to Table 2 and novel mutations, if any, should be highlighted.

**References for previously reported mutations** **have been added to Table 2, as requested. Non-previously reported mutations have been indicated as “novel” [if they are not included in the Human Mutation Database and/or not reported in the MEN1 mutation reviews (i.e Lemos & Thakker 2008 and Concolino et al. 2016). And also after a specific search on Pubmed]**

6) In the Results, the authors state that "No statistical correlation was found between age of onset and MEN1 mutation type or localization". These negative data should be presented in a table with the relative P values.

**A table (named Table 5) was added as requested, reporting the mean age values of first manifestation onset with respect to different mutation kind and localization and all the p values of the Student’s t-test. A paragraph about the applied Student’s t-test has also been added to the “2.3 Data analysis” section.**

7) It would be worth to classify the identified mutations as truncating (frameshift, nonsense, spicing, deletions) and non-truncating (missense, in-frame) and present the distribution of these mutations across the MEN1 gene (Table 1) with a figure.

**Mutations were identified, as requested, also as truncating and non-truncating mutations. Their numerical distribution along *MEN1* exons and introns has been added and presented in Table 1 (by adding two specific columns) instead of by creating a novel figure.**

Notwithstanding the limited number of patients carrying missense mutations, the authors should analyse whether any phenotype differences (number of manifestations/patient, number of affected subjects/pedigree, age at onset/diagnosis, etc.) could be identified between those carrying non-truncating and truncating MEN1 mutations.

**A novel table (named Table 6) was added, reporting the occurrence of the MEN1 main tumors and the number of manifestations/patient ratio between MEN1 truncating and non-truncating mutations**

**Analysis of differences in mean age values of the first manifestation onset in truncating vs non-truncating mutations was reported in Table 5.**

**Number of affected subjects/pedigree is not valuable since in our database we collected only data about affected patients. No data about number of healthy relatives are available.**

8) The authors report an increased prevalence of nonsense mutations in GEP NET patients, while lung NETs were more common among those with a splice site mutation. The authors should speculate on the reasons behind these findings. Both nonsense and splice site mutations are expected to equally result in a loss-of-function. Could any selection biases explain these findings?

**We explained in the discussion that further studies, including broad and different MEN1 populations, are needed to confirm these association data and to exclude the possibility they could be only accidental statistical associations (this second part of the sentences, about the possibility of accidental statistical associations has been added to the “discussion” section).**

**We also added, to the “discussion” section, a brief explication of why we do not suspect any possible selection bias during the collection of our MEN1 patients.**

9) The authors present the case of a remarkably large family (with 20 affected subjects). It would be worth to provide a family tree highlighting the different phenotypes.

**This is a very large family spanning different generations. Unfortunately, we are not able to reconstruct the exact family tree since our database only includes MEN1 affected patients or asymptomatic individuals with an identified *MEN1* mutation (only data from patients who were referred to endocrine referral centers, included in the study, are available; data about affected individuals not followed up at these centers are totally missing). Also data about unaffected relatives are not available.**

10) It is known that relatives of affected probands are diagnosed earlier, probably as a result of increased disease awareness and prospective screening. These factors should be mentioned in the Discussion (6th paragraph).

**A sentence discussing the earlier tumor diagnosis in proband’s relatives has been added, as requested, to the “discussion” section (it has been added at 8th paragraph, when we discuss about the importance of the genetic test in the early diagnosis and intervention)**


Reviewer #2:

1. As reported in the section of Discussion (Pag. 6, Line 2), patients with GEP NETs tumors express more frequently non-sense mutations than frameshift or missense mutations. However, this concept is not congruent with what is described in Table 3. 
   Here, it is reported that 84 patients with frameshift mutation develop NETs GEPs against 50 patients with non-sense mutation and 44 patients with missense mutation who are affected by the same tumor. There is a mistake?

**Differences of single tumor frequencies in our MEN1 patients with different kind of mutations have been statistically evaluated by chi-squared test, assuming a positive significance with p <0.05, through the comparison of the ratio of GEP-NETs/affected patients with nonsense mutations vs ratio of GEP-NETs/affected patients with missense mutations or frameshift mutations**

**Results of statistical analysis are**

**
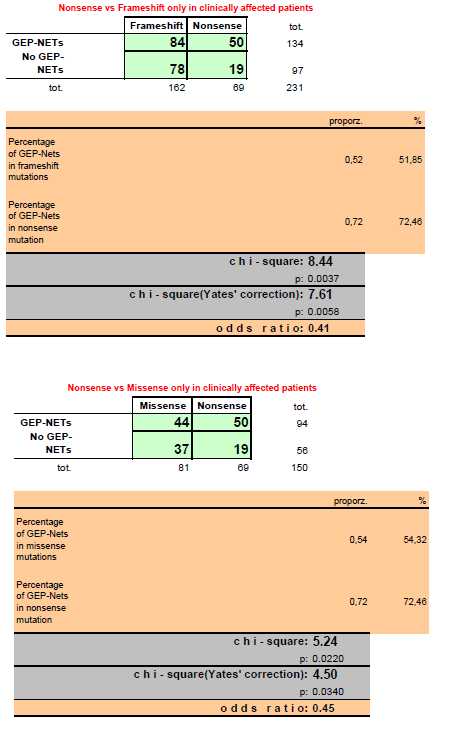
**

2- As reported in the section of Discussion (Pag 6, Line 16), 3 members of a large MEN1 family (24 mutated subjects), did not develop PHPT at the age of 55, 57 and 64 years respectively; but they had a common involvement of the neuroendocrine tissue of the GEP tracts. 
Did you study the type of mutation in these three subjects? It was the same?

**Mutated members of this family were ALL bearing the same mutation (frameshift g.1449_1459 del11 in exon 9) which alters all the three NLSs of menin protein (as reported in Table 2). Mutation has been added in the text of the manuscript, at the time of family description (page 6), as requested. The presence of the same mutation in all the members of this family, presenting different clinical phenotypes, indicates the absence of a direct genotype-phenotype and suggests the existence of other modulatory factors in the MEN1 tumorigenesis**

Reviewer #3: Marini et al present an interesting analysis of germline MEN1 mutations in an Italian multicenter MEN1 cohort that consists of 410 MEN1 patients. Their data supports previous reports of the types of MEN1 mutations and comordidities associated with MEN1. Additionally, they expand on the intra-familial clinical phenotypes in MEN1, showing a high variability in disease age of onset and severity of the clinical manifestations, and cause of death.

Suggestions:

Introduction, line 12; familial form not "familiar form"

**It has been modified**

First introductory paragraph should be split into two paragraphs

**It has been done, as requested**

Replace the term "carcinoids" with neuroendocrine tumors. Use WHO nomenclature

**The term “carcinoids” has been replaced with neuroendocrine tumors (NETs), as requested, both along the text and in the tables.**

The authors are encouraged to report on the percentage of mutation negative patients, and whether CDKN1B was considered and/or tested in any patient.

**The percentage of *MEN1* negative patients was added within the “2.2 MEN1 gene mutation analysis” section together with data about *CDKN1B* genetic screening.**

The authors are encouraged to provide details regarding the subtypes of adrenal hyperplasia. Primary bilateral macronodular adrenocortical hyperplasia? Bilateral hyperplasia secondary to excess ACTH?

**All cases of adrenal hyperplasia reported in this study are primary diseases. No cases of bilateral hyperplasia secondary to an excess of ACTH secretion have been described in our patients affected by ACTH-secreting pituitary adenoma. This datum has been added in the footnotes of Tables 3 and 4.**

Of note, there are no ectopic ACTH/CRH secreting NETs in this large cohort. Can the authors provide an explanation for this?

**We do not have reported any case of ectopic ACTH/CRH secreting NETs. We are not able to provide a scientific or clinical explanation for this.**

It is interesting that there were a few ACTH secreting pituitary adenomas. A pie chart outlining the percentage of each comorbidity is encouraged.

**Comorbidities associated with our cases of ACTH-secreting adenomas have been described (both as kind and number) in the footnotes of Tables 3.**

The authors are encouraged to report on the incidence of breast cancer (if any) in their MEN cohort

**No breast cancer incidence has been estimated in our series; data about current or past breast cancer were available only for a very few number of collected patients**

The authors are encouraged to expand on their genetic testing methodology: Was a gene-targeted duplication analysis performed if no pathogenic variant was found? Was a multigene panel that includes MEN1 and other genes of interest performed or only the outlined genetic tests?  The diagnostic sensitivity of the any genetic test performed should be outlined.

**As reported in the manuscript, all patients included in this study underwent the classical PCR-based Sanger’s sequencing screening of MEN1 coding regions (exons 2-10) and splicing sites. Only four negative pedigrees were analyzed by MPLA test. Fifteen negative affected patients were not yet analyzed with MPLA, four of them resulted to be negative to the mutation analysis of the CDKN1B gene. No multigene panel screening was performed. All these data have been added to the “2.2 MEN1 gene mutation analysis” section.**

**Sensitivity and limitation of sequencing analysis has been also added within the “2.2 MEN1 gene mutation analysis” section, at the time of the description of the method.**
